# Supplementary material for: Assessing DNA methylation detection for primary human tissue using Nanopore sequencing
Source: HighWire-hosted journal article supplement (doi:10.1101/gr.279159.124), 2025-03-07
Supplement: Supplemental_Material.pdf [file Supplemental_Material.pdf]

## **Supplemental Information**

### **Assessing methylation detection for primary human tissue using Nanopore sequencing**

Rylee Genner, Stuart Akeson, Melissa Meredith, Pilar Alvarez Jerez, Laksh Malik, Breeana Baker, Abigail Miano-Burkhardt, CARD-long-read Team, Benedict Paten, Kimberley J Billingsley, Cornelis Blauwendraat, Miten Jain

Correspondence: Cornelis Blauwendraat ([cornelis.blauwendraat@nih.gov](mailto:cornelis.blauwendraat@nih.gov)), Miten Jain ([mi.jain@northeastern.edu](mailto:mi.jain@northeastern.edu))

#### **This PDF file includes:**

Supplemental Figures S1-S21

Supplemental Tables S1-S13

Supplemental Methods

## Supplemental Figures

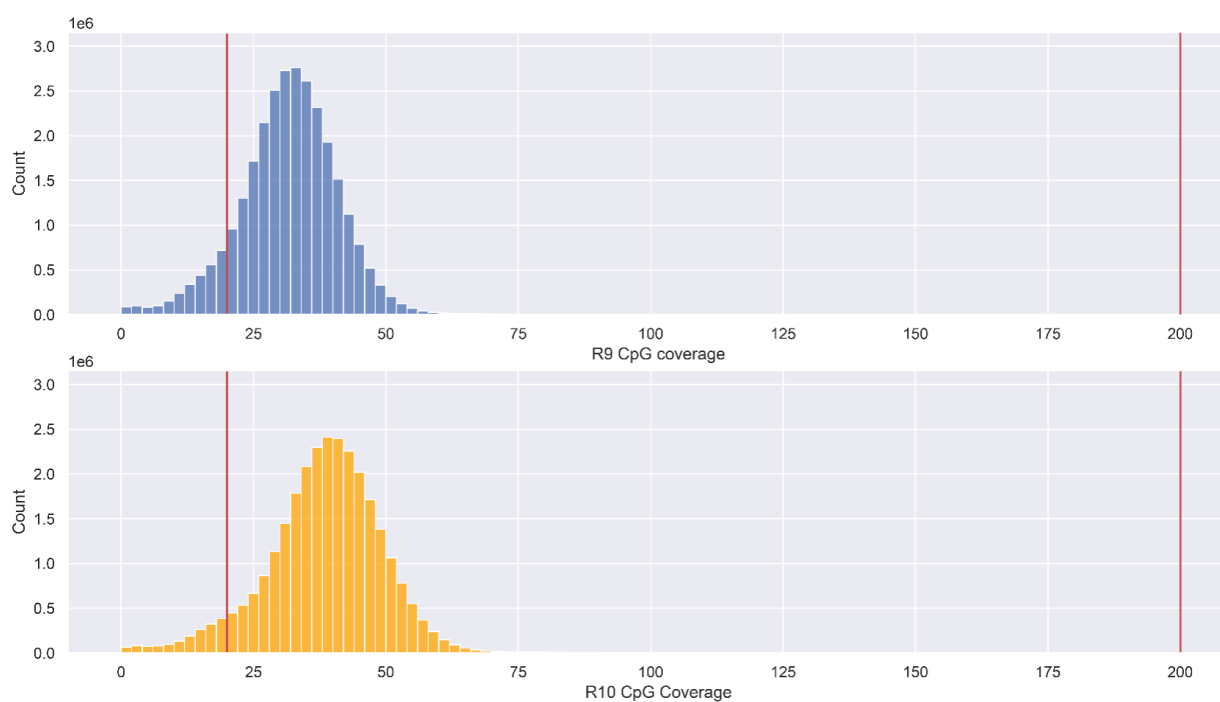

**Supplemental Fig. S1** Histograms showing the coverage of the R10 and R9 HG002 datasets. Red vertical lines indicate the 20× and 200× cutoffs used in this analysis.

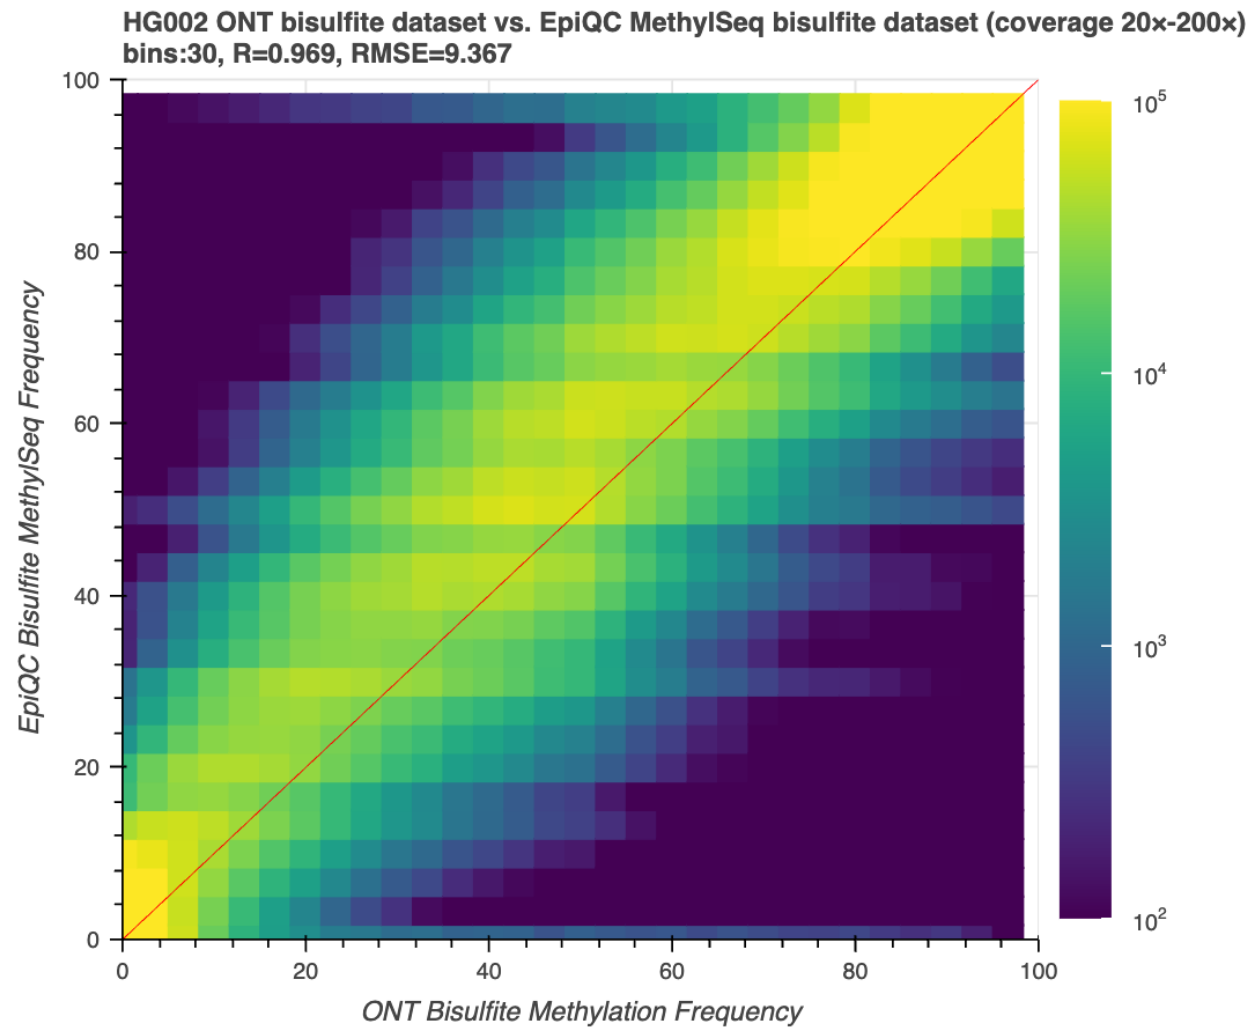

**Supplemental Fig. S2** Heatmap showing the correlation between the HG002 ONT bisulfite dataset and a Swift Accel-NGS Methyl-Seq dataset generated in the HG002 EpiQC study.

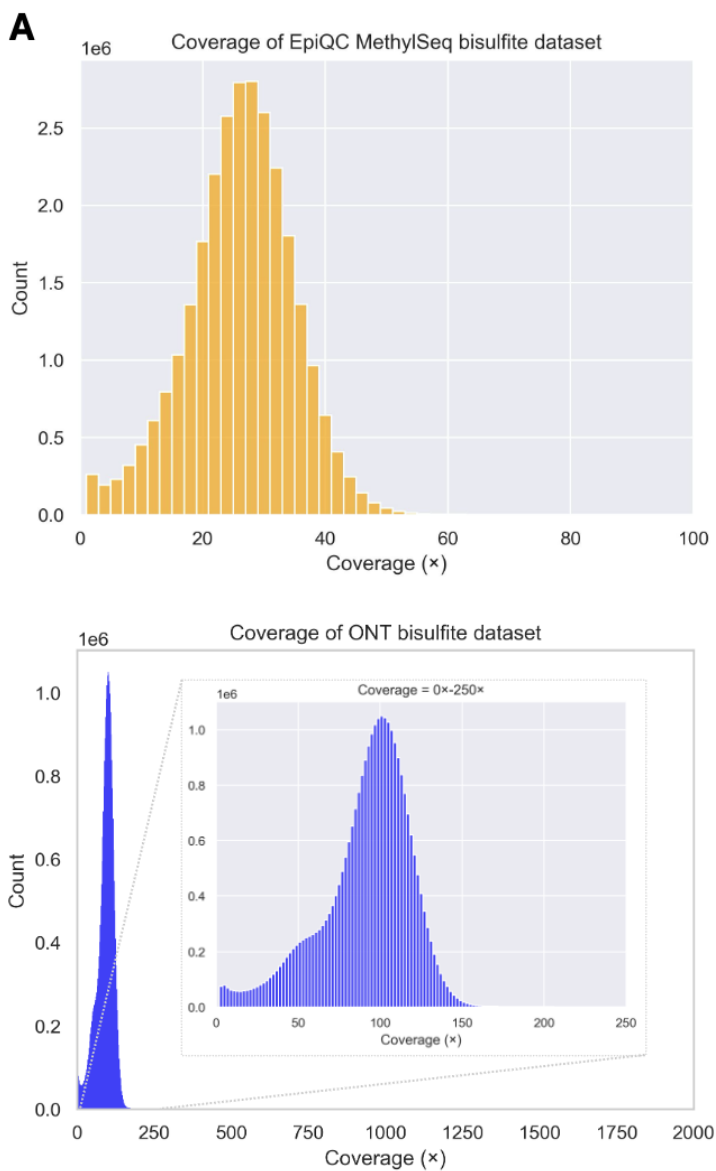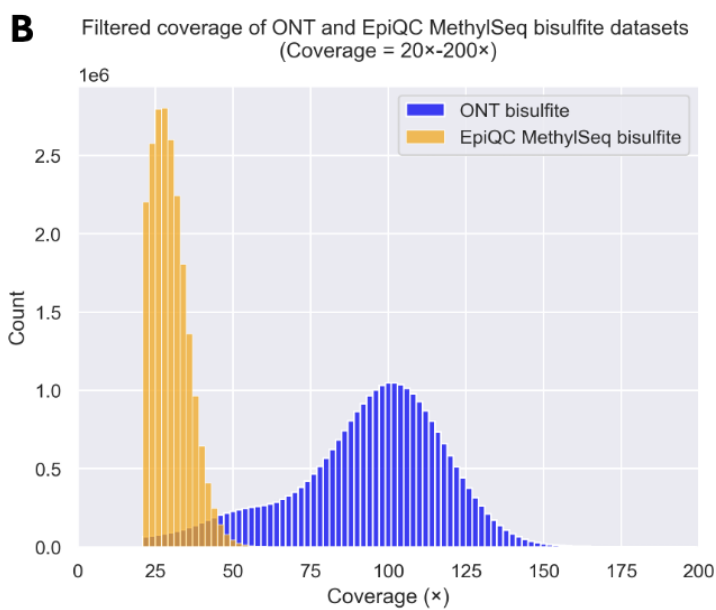



**Supplemental Fig. S3** Coverage differences in HG002 ONT bisulfite and EpiQC bisulfite datasets. (A) Original, unfiltered coverage levels for the HG002 EpiQC bisulfite dataset (top, mean coverage = 26.03×) and the ONT bisulfite dataset (bottom, mean coverage = 92.95×). (B) Post-filtering coverage levels (20× - 200×) for both datasets.

A

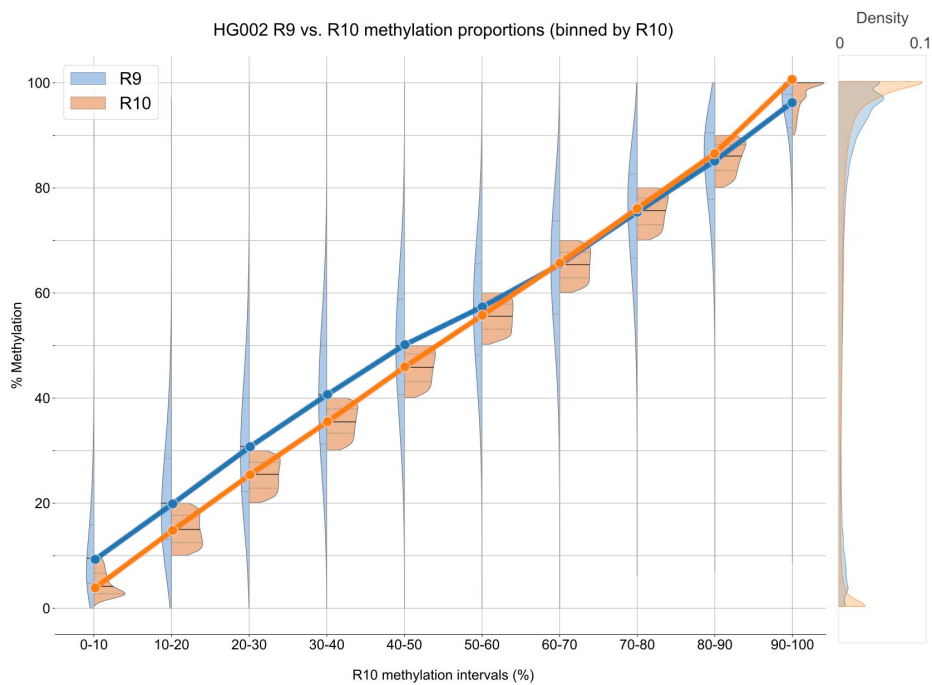

B

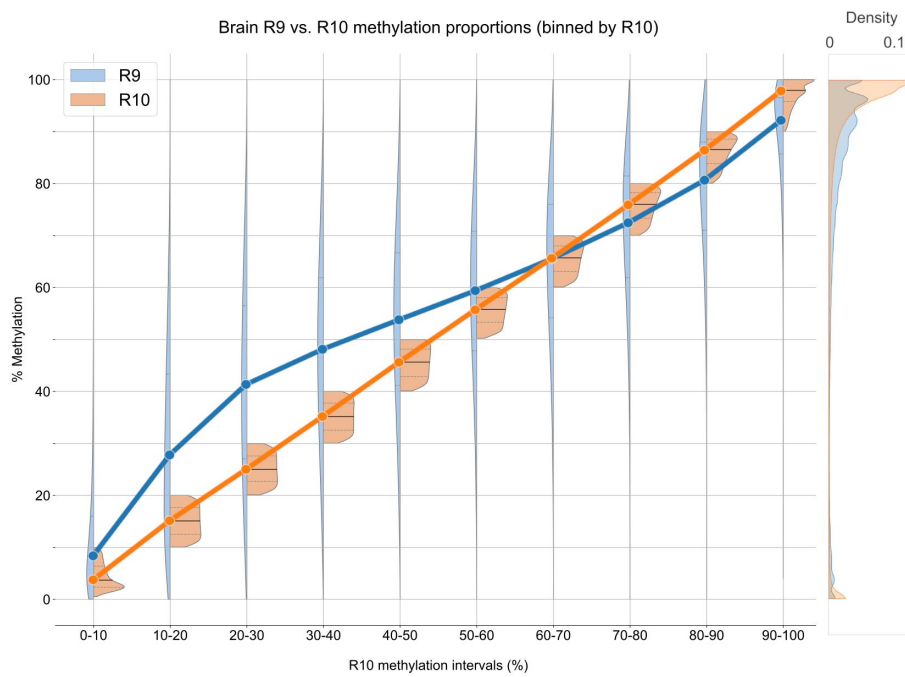

C

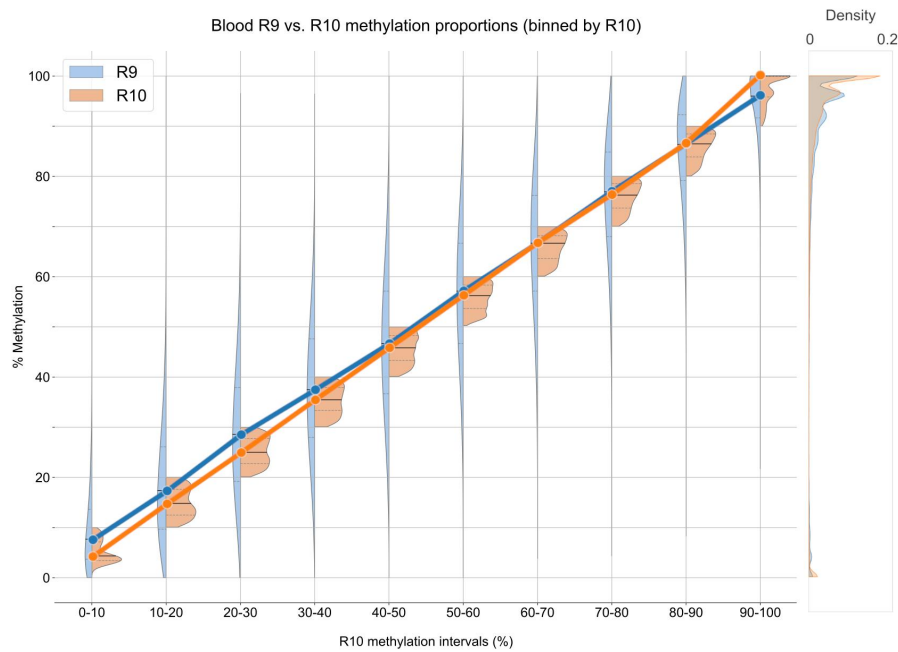

**Supplemental Fig. S4** Methylation intervals detected from R9 and R10 data for the HG002 cell line (A), brain sample (B), and blood sample (C) binned according to R10 intervals. Distributions of CpG site frequencies for R9 and R10 are depicted on the right side of each of the subpanels. R9 methylation frequency distributions are shown in blue and the R10 distributions are shown in orange. The overlaid line plots connect the median interval points to visualize methylation trends.

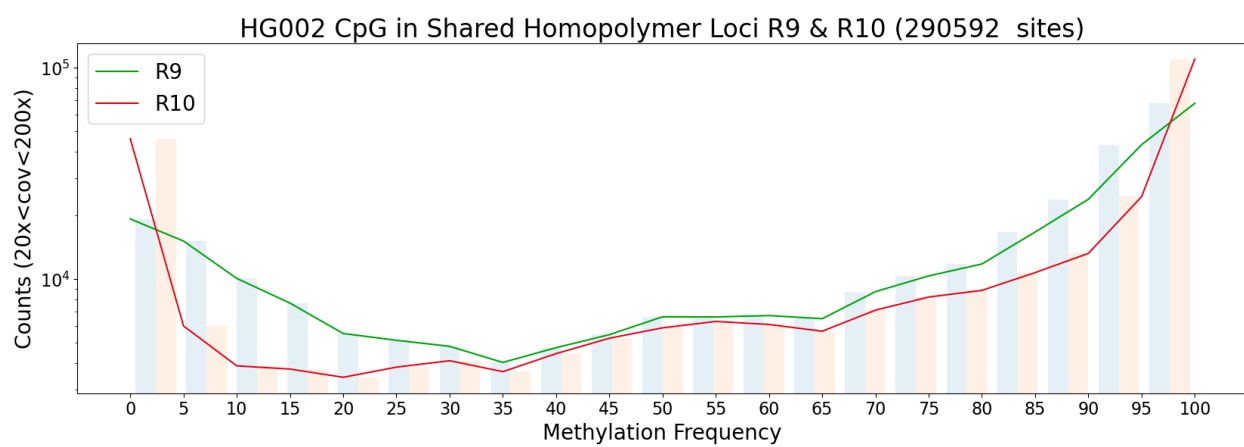

**Supplemental Fig. S5** HG002 methylation frequency in shared homopolymer loci for R9 and R10.

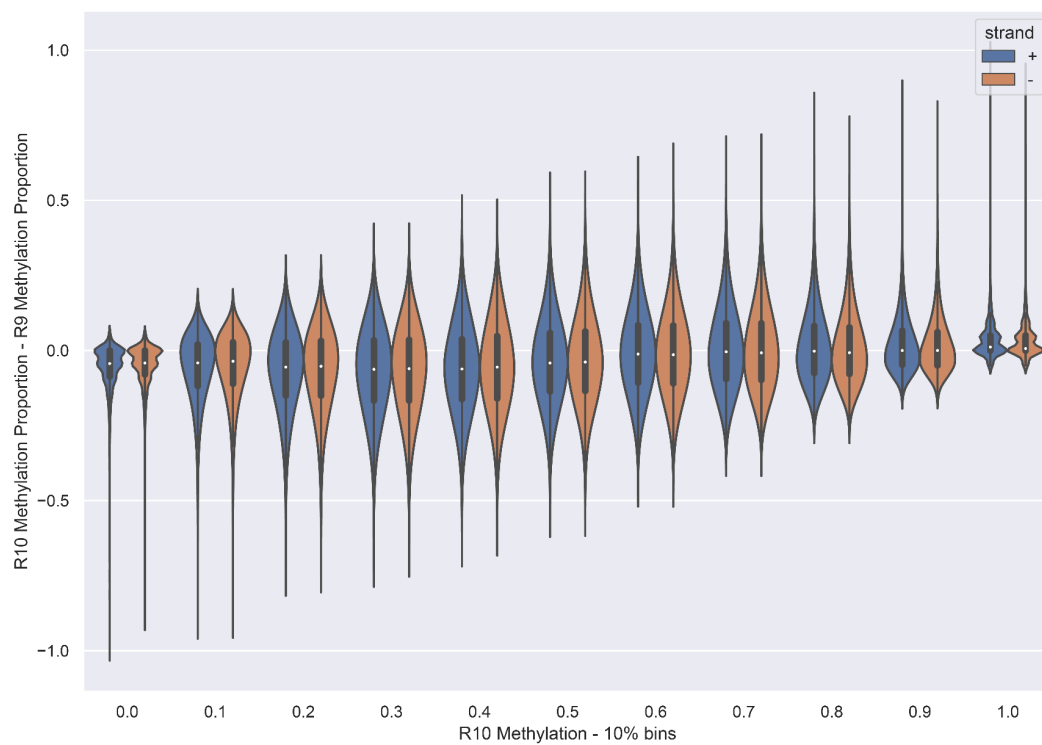

**Supplemental Fig. S6** Difference in methylation proportion between R10 and R9 datasets divided by strand of origin and binned by R10 methylation proportions in the HG002 dataset.

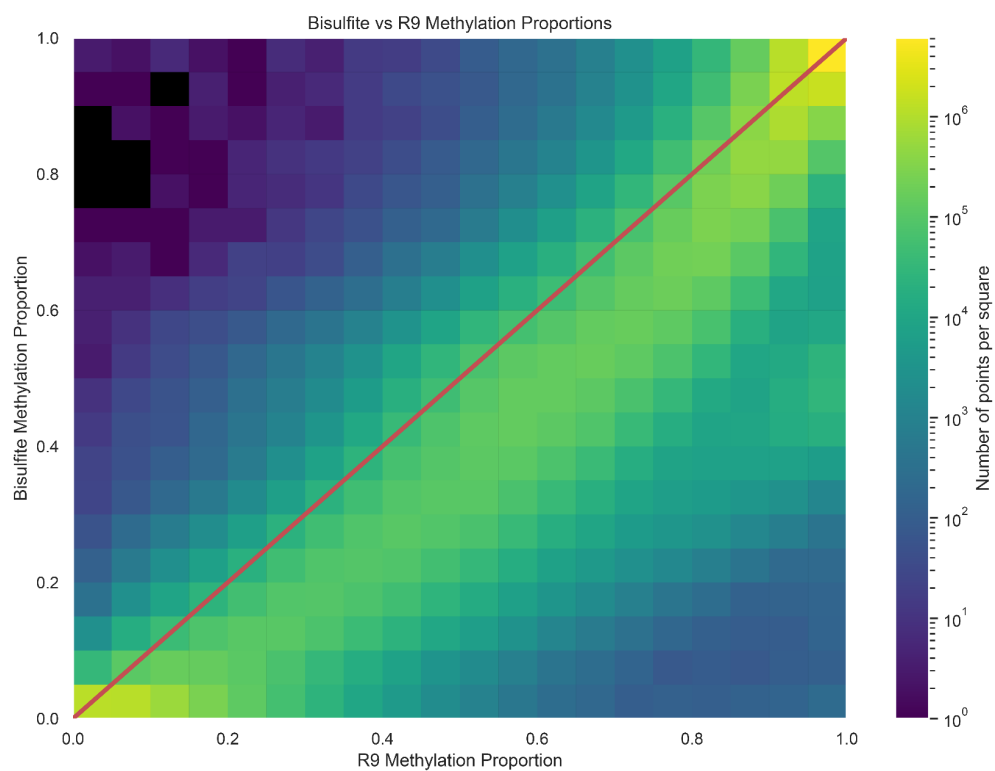

**Supplemental Fig. S7** R9 Ultra-long methylation proportion data plotted against bisulfite methylation proportion data.

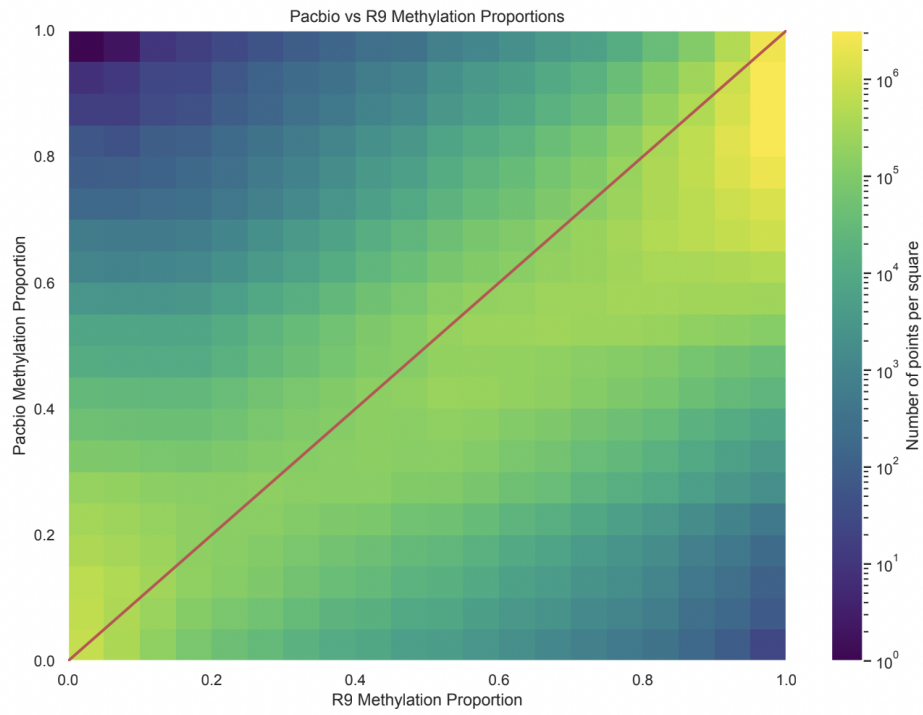

**Supplemental Fig. S8** R9 Ultra-long methylation proportion data plotted against PacBio methylation proportion data.

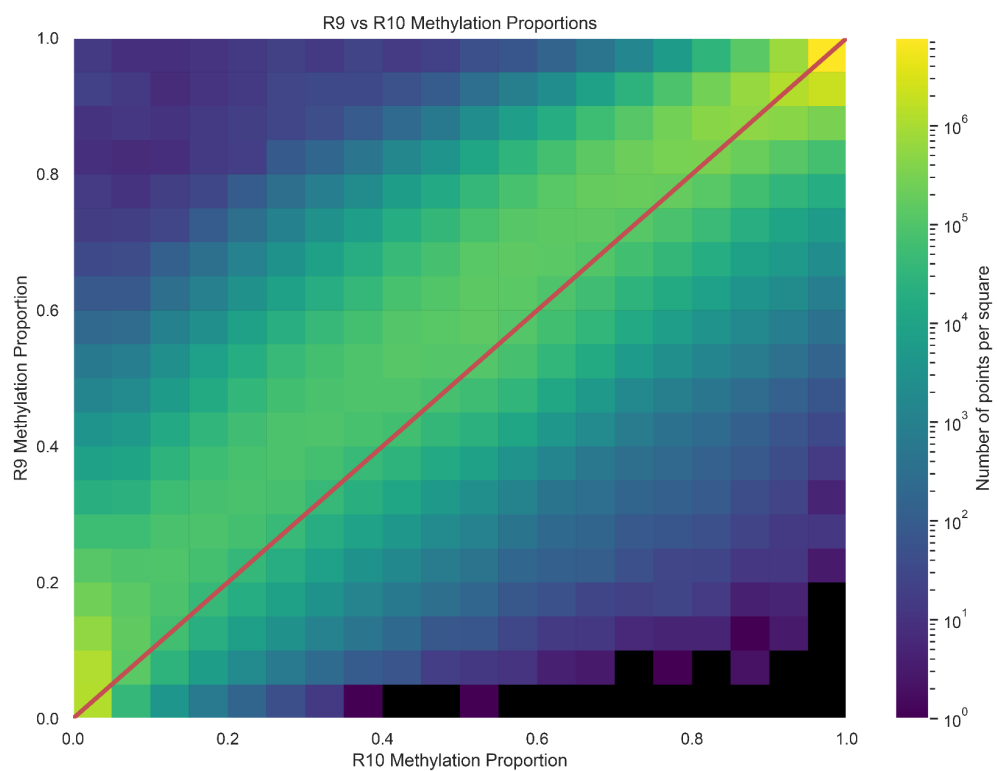

**Supplemental Fig. S9** R10 Ultra-long methylation proportion data plotted against R9 Ultra-long methylation proportion data.



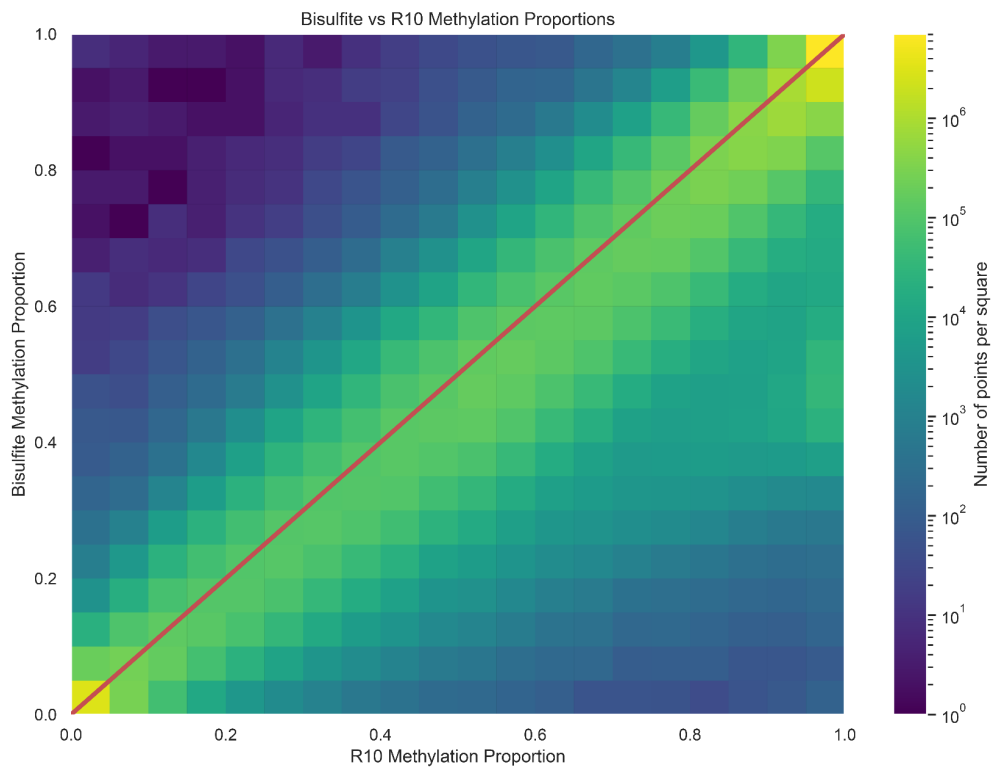

**Supplemental Fig. S10** R10 Ultra-long methylation proportion data plotted against bisulfite methylation proportion data.

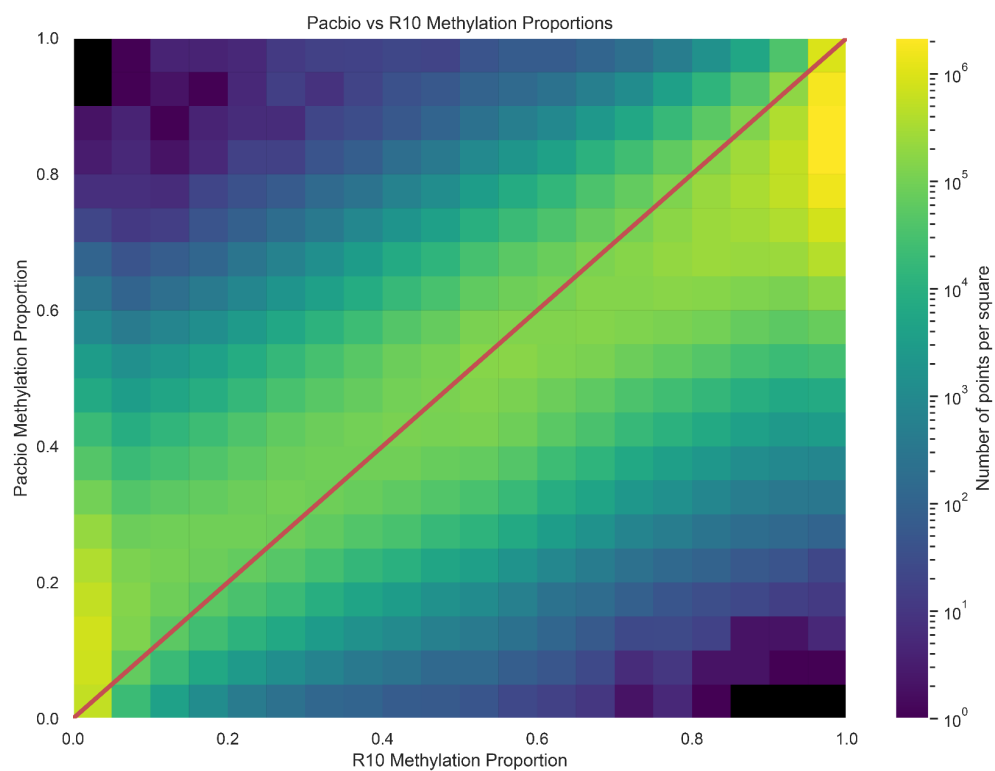

**Supplemental Fig. S11** R10 Ultra-long methylation proportion data plotted against PacBio methylation proportion data.

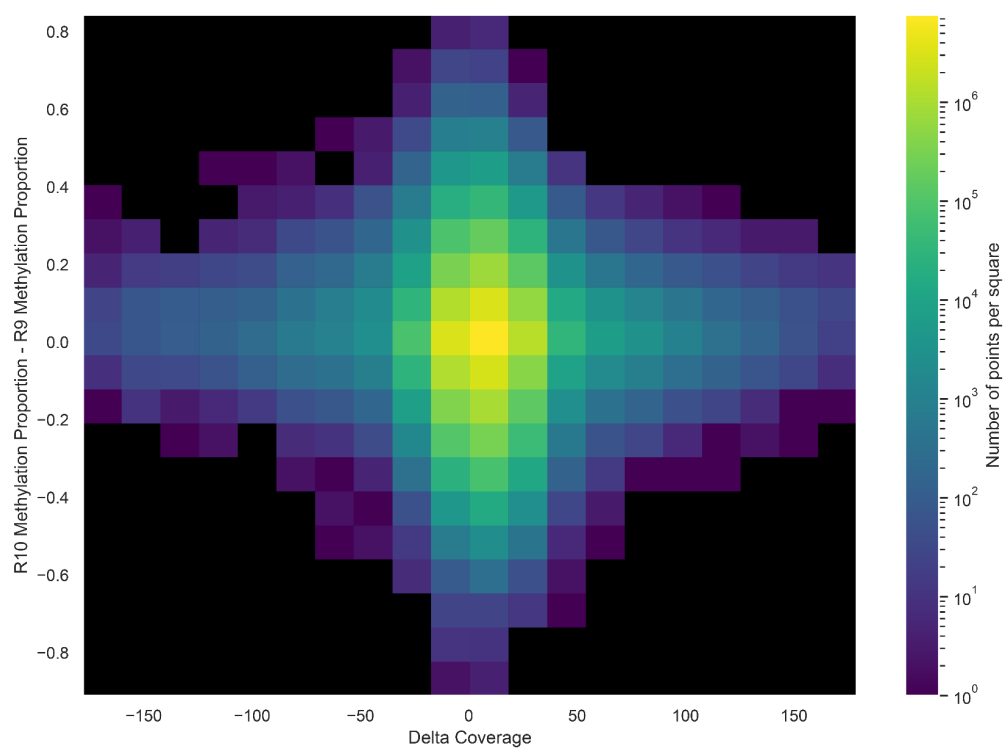

**Supplemental Fig. S12** Difference in coverage between R10 methylation dataset and R9 methylation dataset plotted against their difference in proportion.

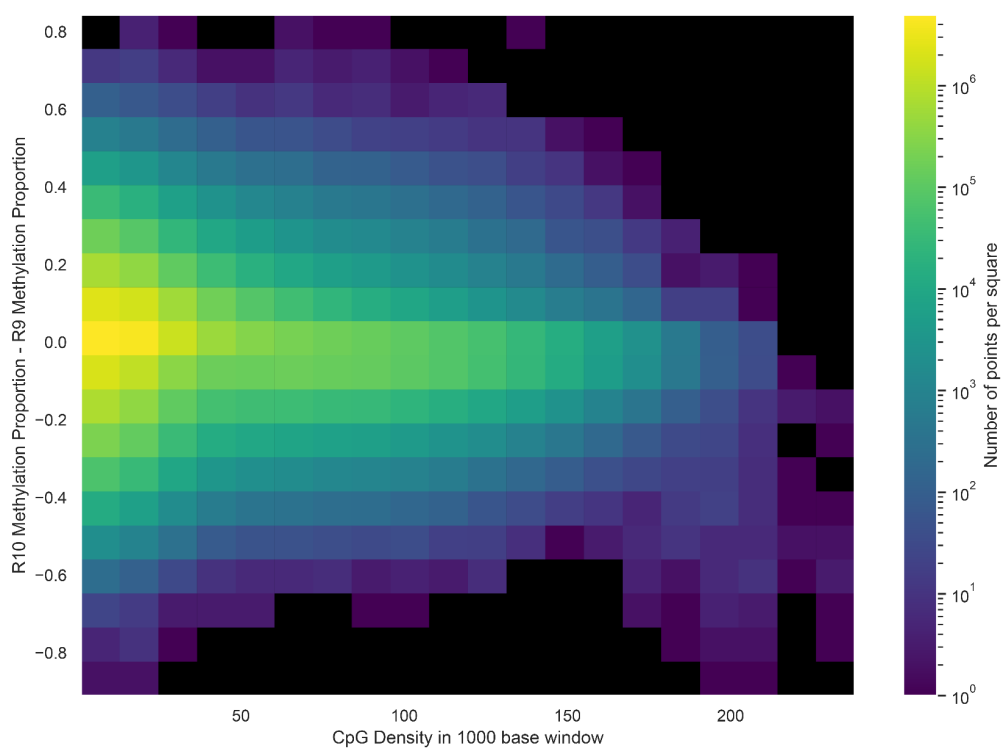

**Supplemental Fig. S13** Number of candidate CpG sites on the reference genome GRCh38 in a 1000 base window around the point of interest plotted against the difference in proportions of methylation of R10 Ultra-long and R9 Ultra-long data sets.

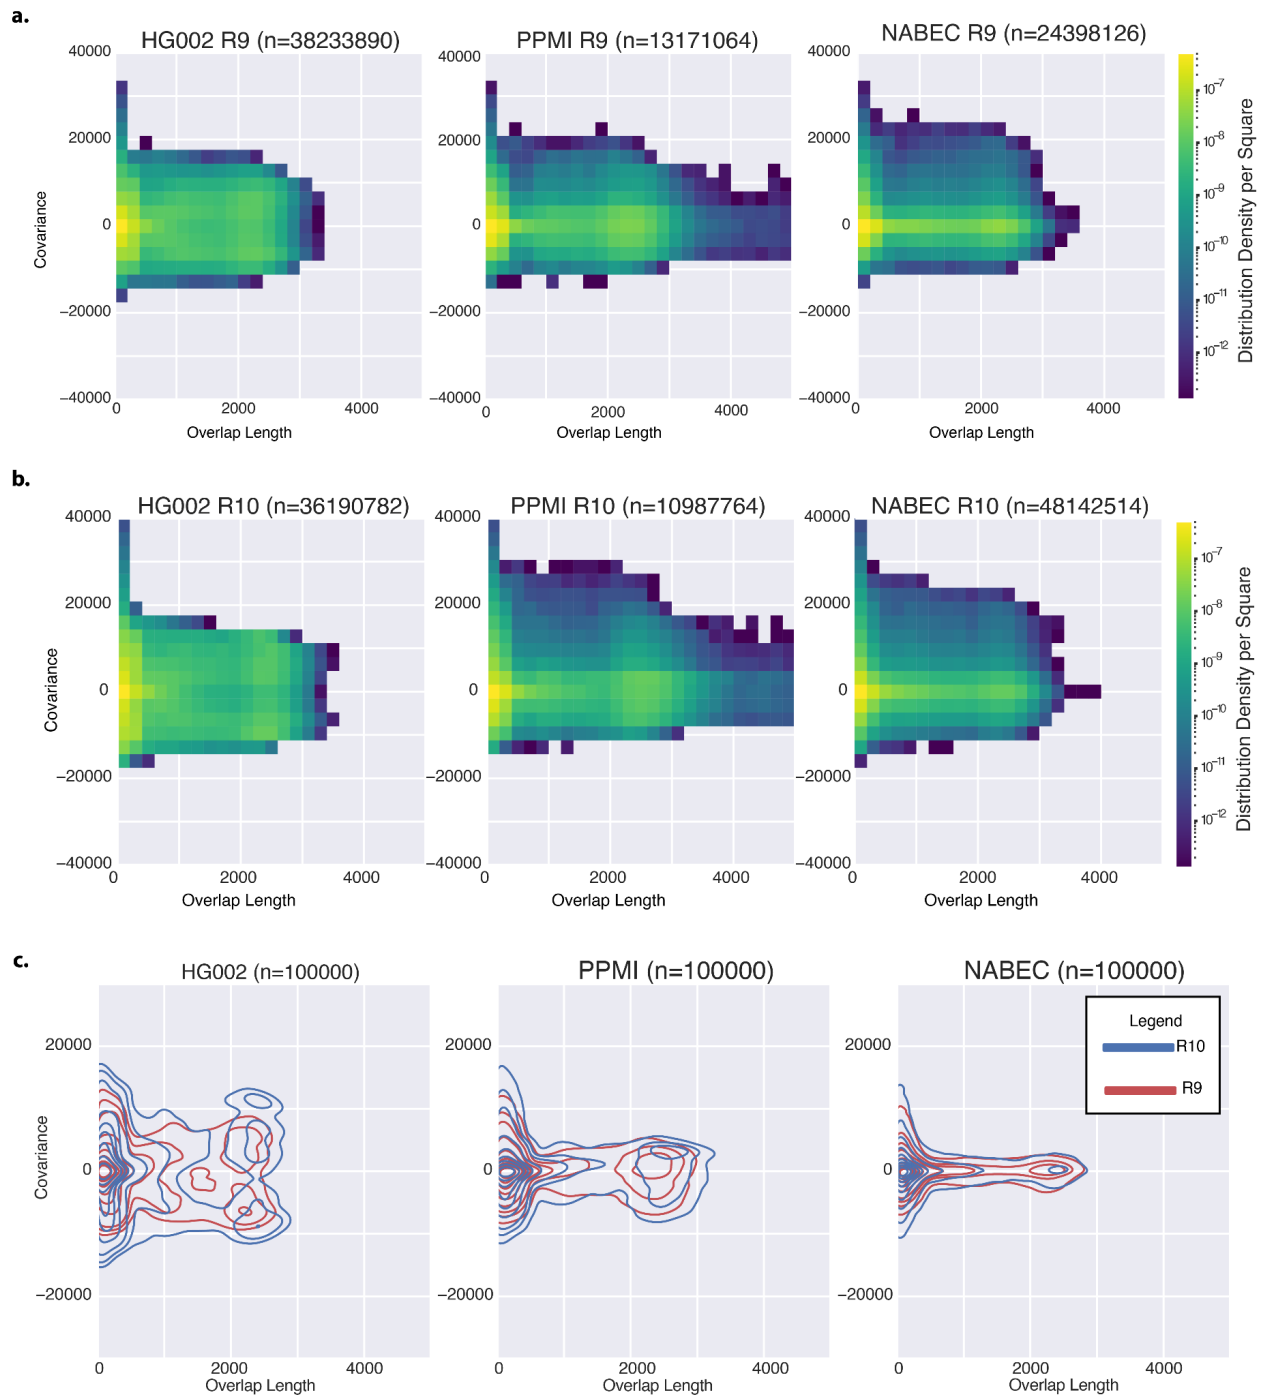

**Supplementary Fig. S14** (A) Covariance measurements of modification confidence in overlapping sections (20+ CpG overlapping) of R9 reads in HG002, blood, and brain samples. (B) Covariance measurements of modification confidence in overlapping sections of R10 reads in HG002, blood, and brain samples. (C) Superimposed KDEs of R9 and R10 covariance distributions for overlapping reads.

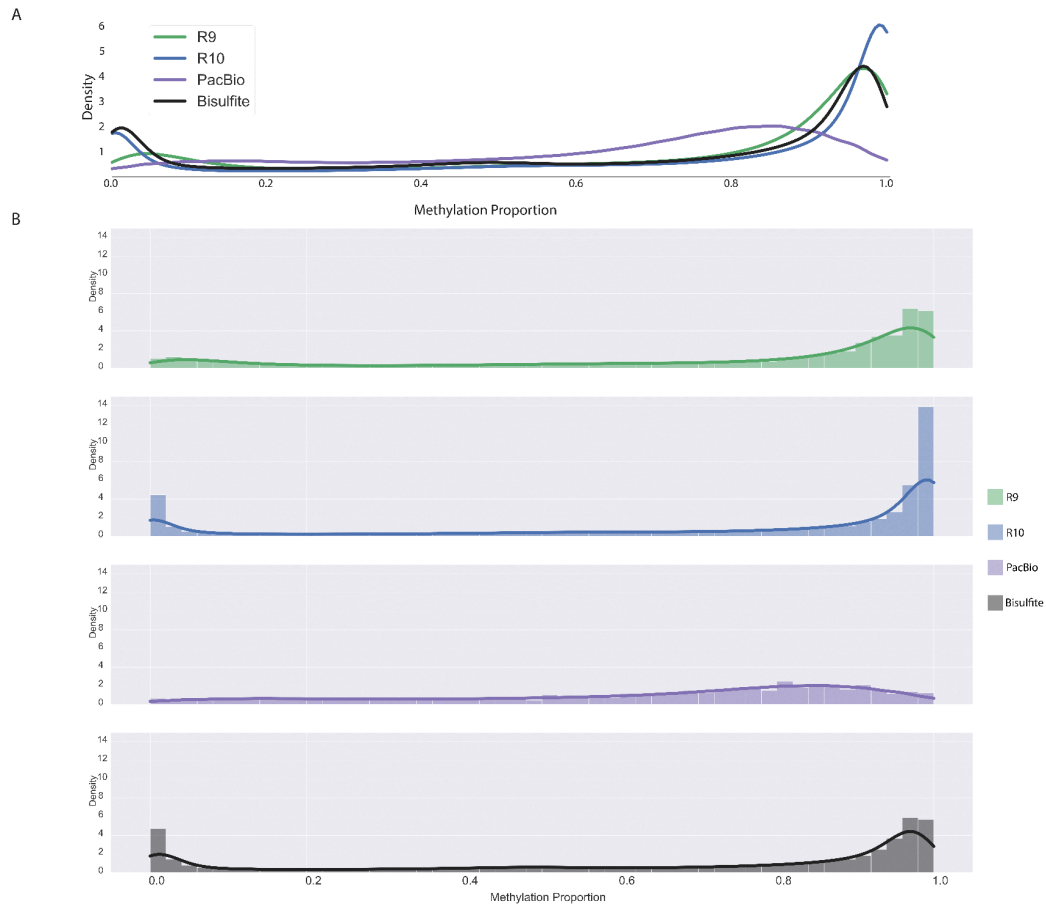

**Supplemental Fig. S15 A.** KDE plots of methylation proportion for R10, R9, Bisulfite, and Pacbio. We note that the KDE's here do not use a support specific to the  $[0,1]$  bounded nature of the data, this can lead to spurious dips towards the edges of the KDE. **B.** KDE over histograms of methylation proportion for each of the technologies methylation frequency for HG002. Cut is set at  $[0,1]$  for KDE to minimize the distribution visually extending beyond the possible values of the data.

A

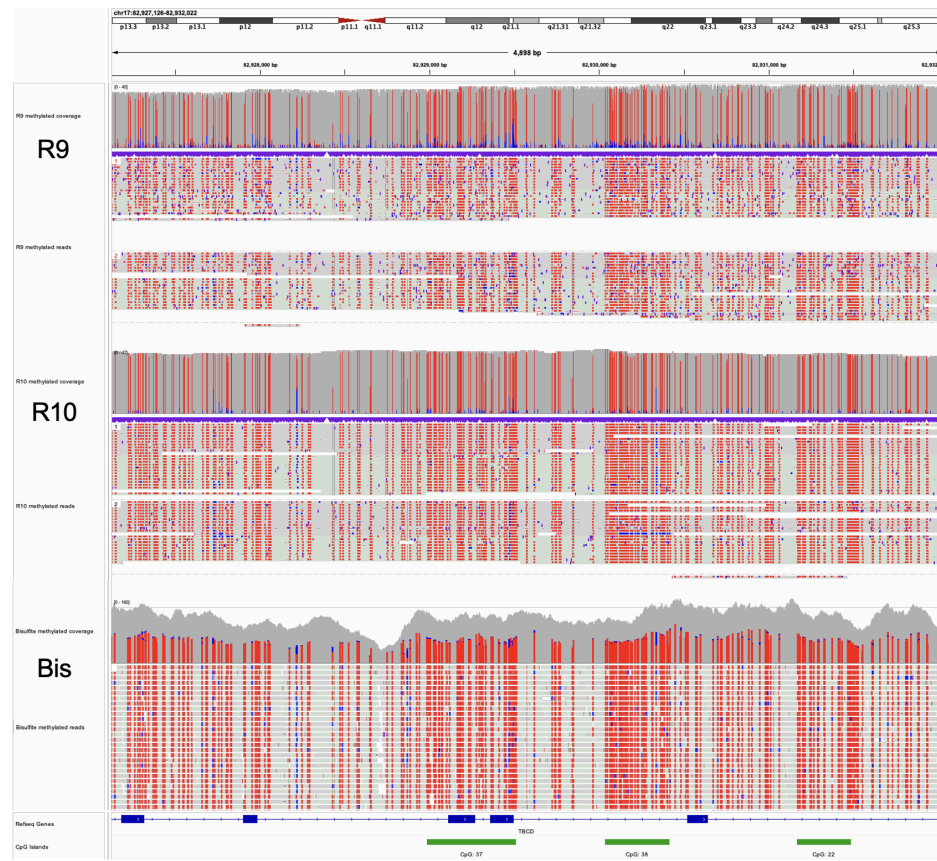

B

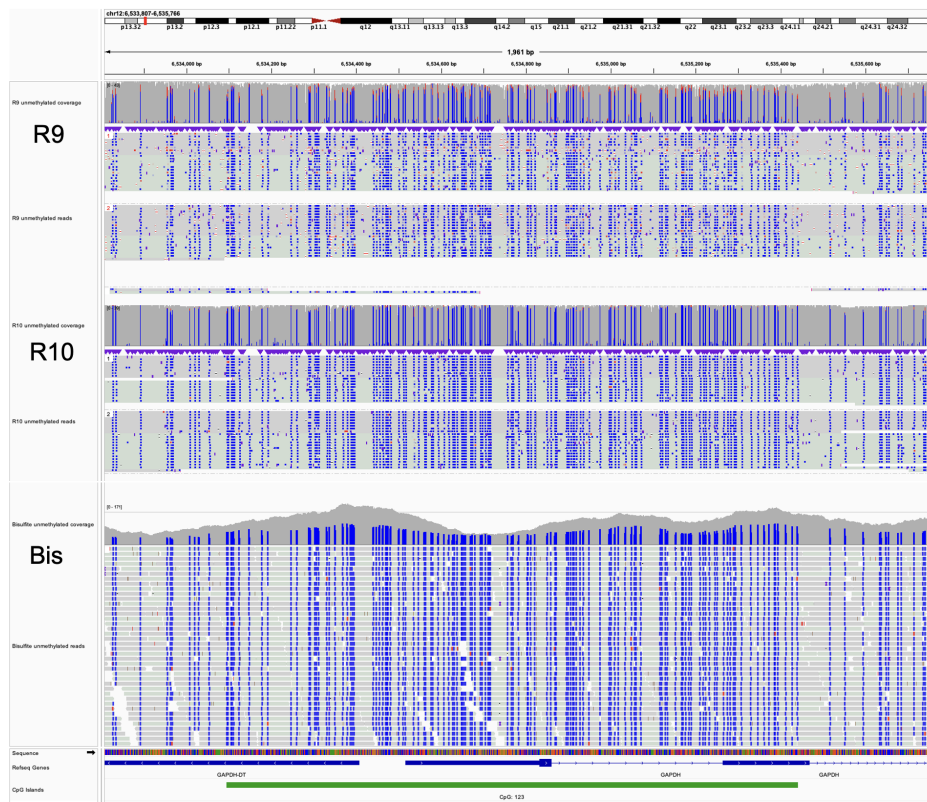

**Supplemental Fig. S16** IGV plots depicting R9, R10, and bisulfite sequencing methylation differences in constitutively methylated and unmethylated genomic regions in the HG002 cell line. IGV (Robinson et al. 2011) was used to visualize methylation patterns in HG002 cell line between ONT R9 and R10 methylation calls and traditional bisulfite sequencing in constitutively methylated (A) and unmethylated (B) regions. A CpG island associated with the GAPDH housekeeping gene was used as the constitutively unmethylated region (Chr12:6533807-6535766)(A) and a region containing several “ultrastable” methylated CpG islands was used as the constitutively methylated region (Chr17:82927126-82923022)(B) (Edgar et al. 2014).



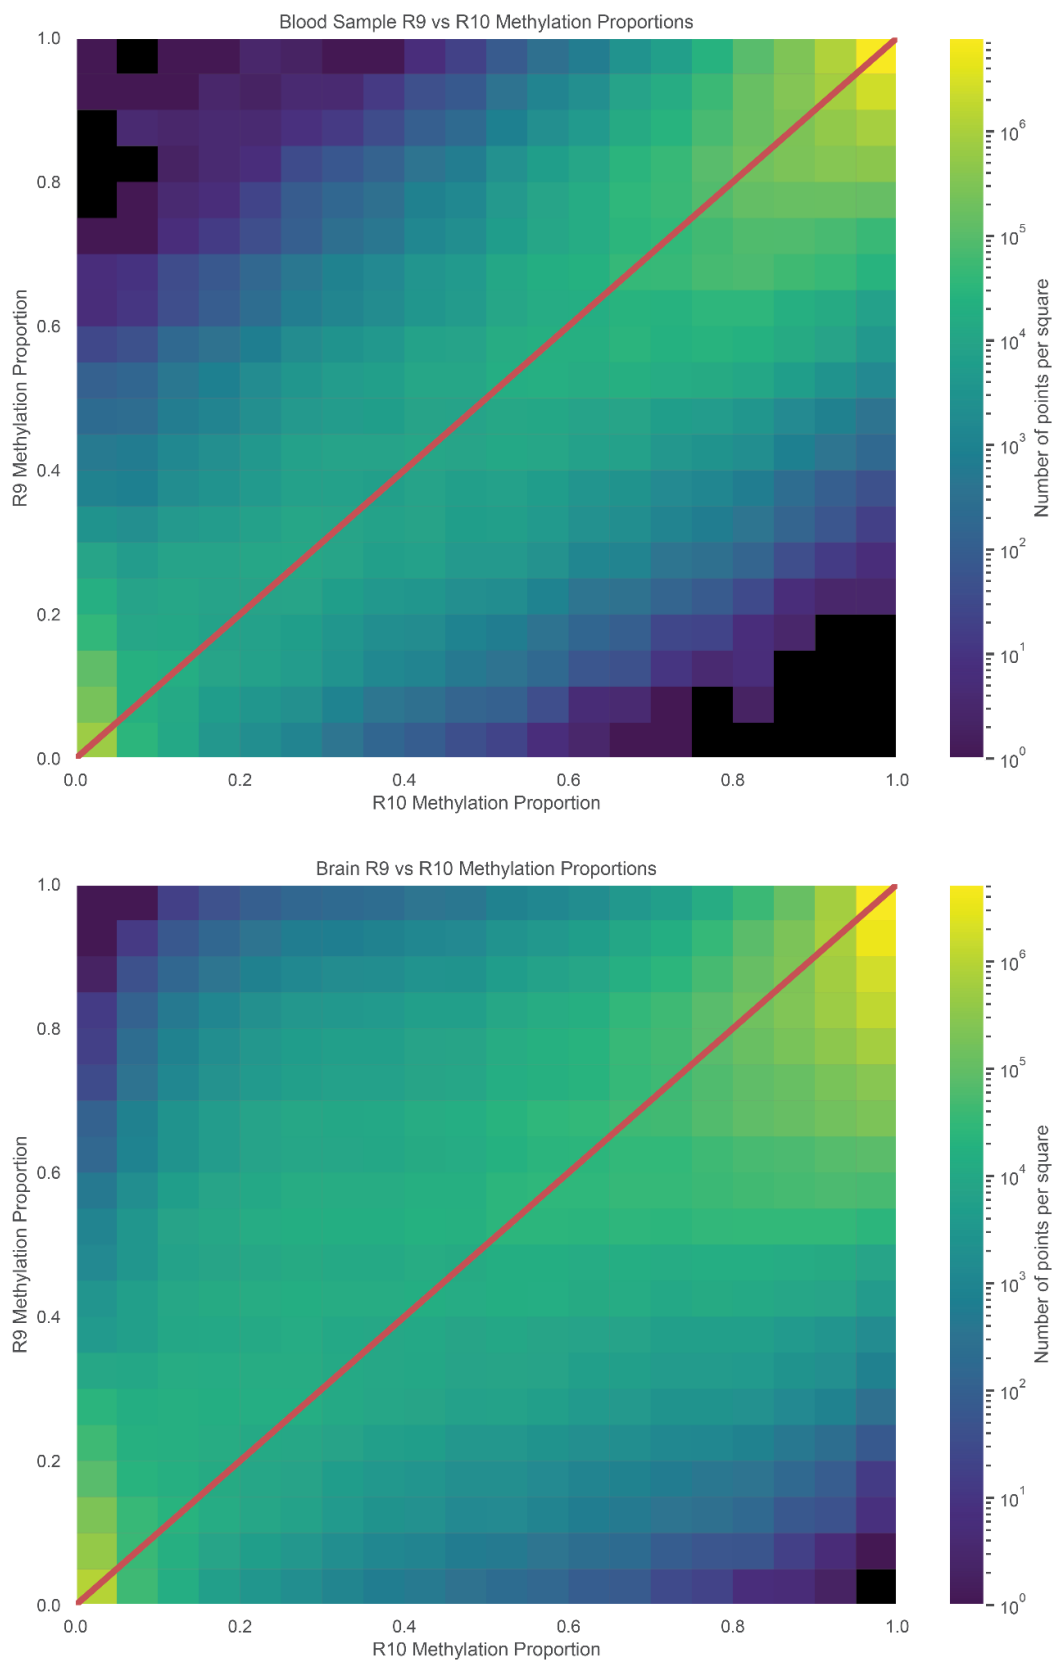

**Supplemental Fig. S17** Methylation proportion heatmap for R9 and R10 blood sample R9 and R10 (top) and R9 and R10 brain sample (bottom).

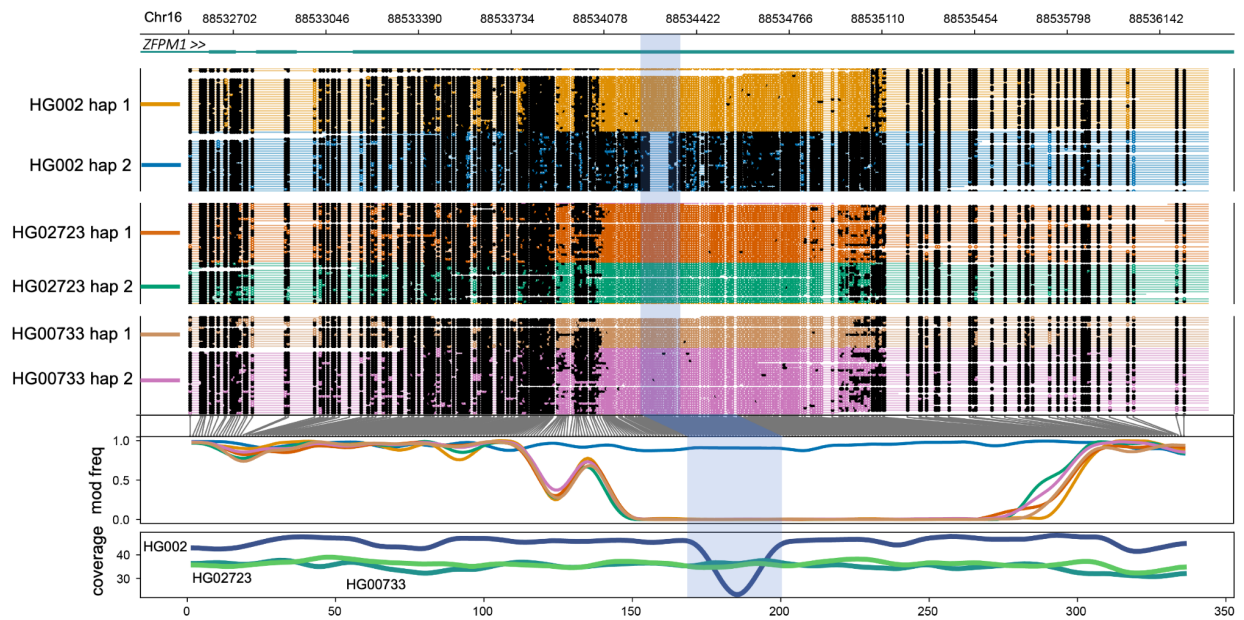

**Supplemental Fig. S18** Haplotype-specific methylation differences and similarities between R10 sequenced HG002, HG02723, and HG00733 GIAB cell line samples. The highlighted region corresponds to a 75 bp deletion present in haplotype 2 of the HG002 cell line that coincides with haplotype-specific methylation. Coordinates across the bottom refer to methylation bins used in the smoothed methylation plot.

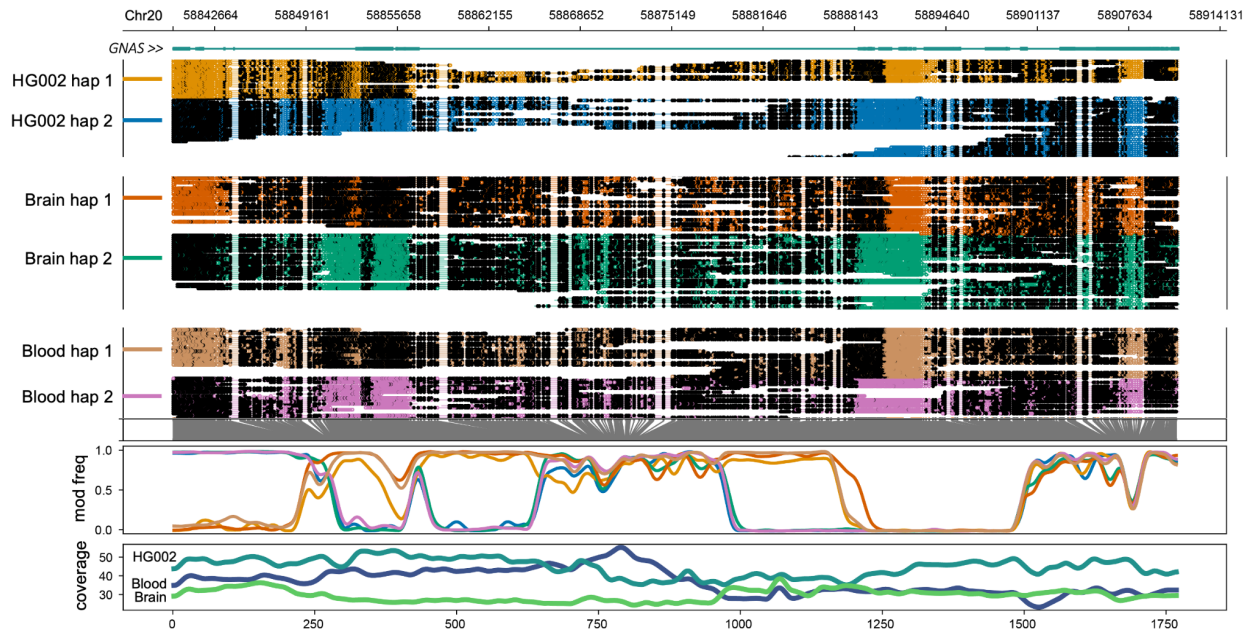

**Supplemental Fig. S19** Haplotype-specific methylation differences and similarities between the R10 sequenced cell, blood and brain samples in an imprinted region of the *GNAS* gene. Coordinates across the bottom refer to methylation bins used in the smoothed methylation plot.

A

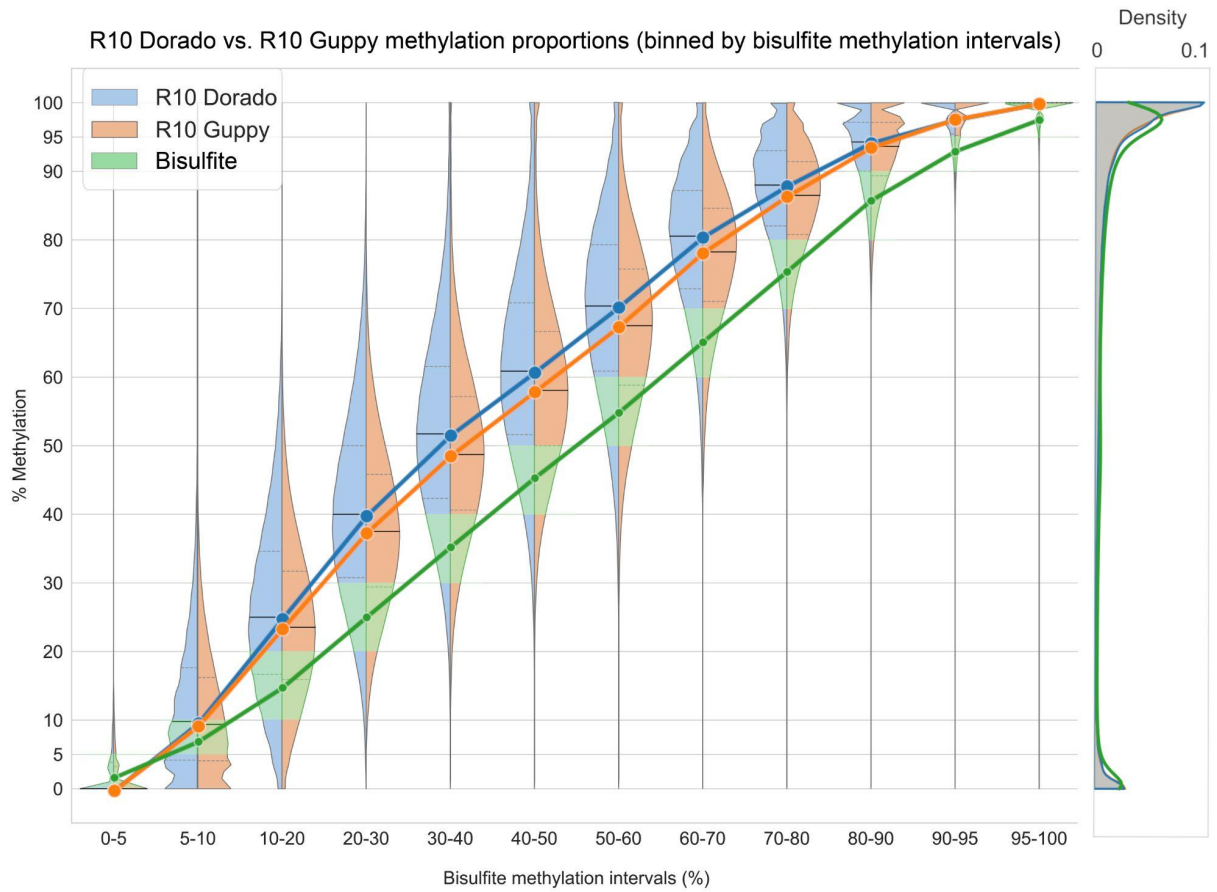

B

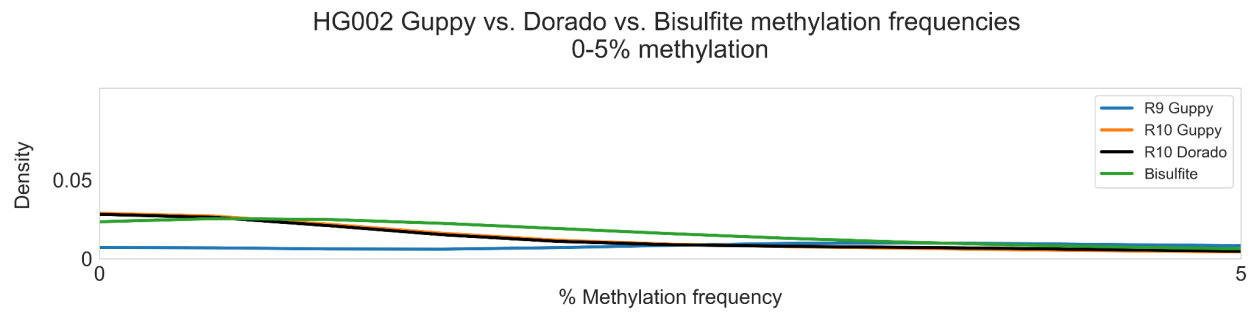

C

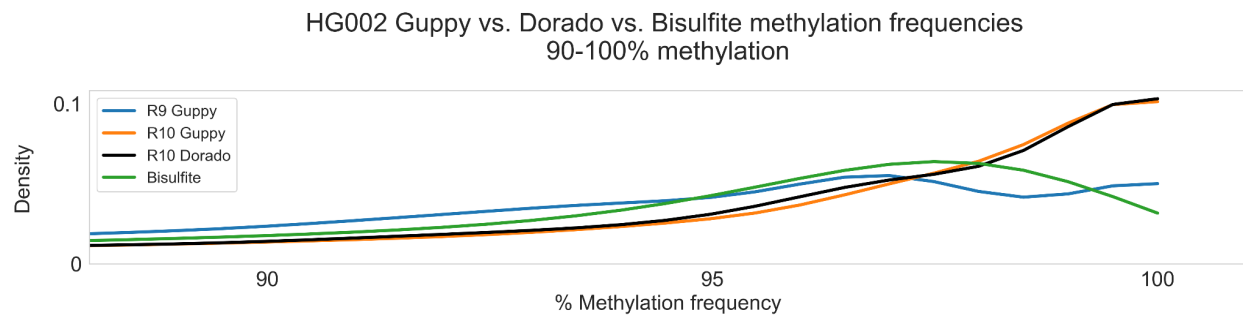

**Supplemental Fig. S20** Overall comparison of DNA methylation calls in an HG002 cell line basecalled with R10 Dorado and R10 Guppy. Only CpG sites on the main chromosomes (1-22, X, Y, M) with coverage levels between 20× and 200× were considered. (A) Methylation proportions of Dorado (blue) and Guppy (orange) data for the HG002 cell line when binned by bisulfite (green) methylation intervals. The portion of R9 and R10 methylation distributions that agree with the bisulfite methylation range are highlighted in green. Lines connecting the median interval points have been added for better visualization of methylation trends. Distributions of CpG site methylation frequencies are depicted on the right side of the panel. (B,C) Methylation proportion plots comparing the HG002 sample basecalled with R9 Guppy, R10 Guppy, R10 Dorado and bisulfite sequencing at 0-10% methylation (B) and ~90-100% methylation (C) proportions.

A

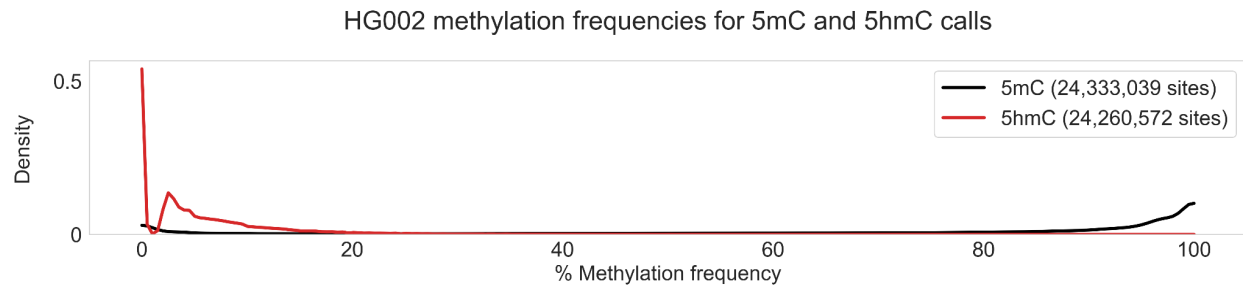

B

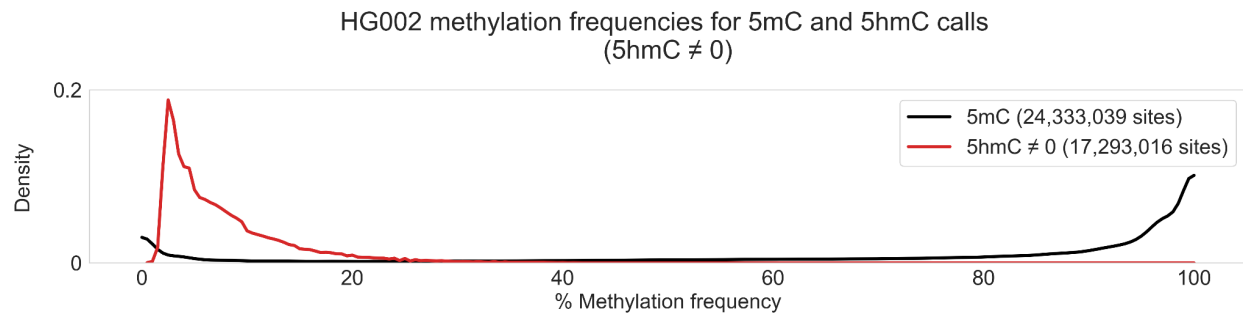

**Supplemental Fig. S21** 5mC and 5hmC methylation proportions in HG002 cell line basecalled with Dorado. Only CpG sites on the main chromosomes (1-22, X, Y, M) with coverage levels between 20 $\times$  and 200 $\times$  were considered. CpG counts for each site are included in the legends. (A) Methylation proportion distributions for 5mC (black) and 5hmC (red) calls for the HG002 cell line. (B) Methylation proportions of the same datasets depicted in S21A but excluding 5hmC calls equal to zero in order to better visualize the two distributions.

## Supplemental Tables

**Supplemental Table S1** Sequencing and alignment statistics for R9 and R10 across HG002, blood, and brain samples. All statistics were calculated using SAMtools MD tags and Pysam.

|                                   | HG002 R9   | H002 R10   | Brain R9   | Brain R10 | Blood R9   | Blood R10  |
|-----------------------------------|------------|------------|------------|-----------|------------|------------|
| Avg. cov                          | 42.1023    | 44.8986    | 38.8627    | 55.4873   | 38.8627    | 35.8224    |
| Avg. cov std                      | 127.921    | 113.94     | 96.7449    | 127.348   | 96.7449    | 91.704     |
| N50 (passed reads)                | 27952      | 28483      | 30055      | 26026     | 34443      | 36484      |
| Alignment length mean             | 17348.5724 | 14438.9332 | 20271.0092 | 7805.6603 | 24836.7853 | 18984.2836 |
| Alignment length median           | 17129.0    | 10293.0    | 21580.0    | 1862.0    | 23912.0    | 14255.0    |
| Read identity mean                | 0.9207     | 0.9657     | 0.9343     | 0.9693    | 0.9297     | 0.9601     |
| Read identity median              | 0.9505     | 0.9872     | 0.952      | 0.9852    | 0.9536     | 0.9855     |
| Matches (per 1kb of ref bases)    | 946.7014   | 978.5276   | 953.911    | 977.728   | 954.2411   | 975.7915   |
| Mismatches (per 1kb of ref bases) | 23.1096    | 9.6513     | 21.3427    | 9.9745    | 19.492     | 10.2314    |
| Deletions (per 1kb of ref bases)  | 30.189     | 11.8212    | 24.7463    | 12.2975   | 26.2669    | 13.977     |

|                                   |         |        |         |        |         |        |
|-----------------------------------|---------|--------|---------|--------|---------|--------|
| Insertions (per 1kb of ref bases) | 17.0911 | 9.1746 | 16.5235 | 8.9238 | 15.8124 | 9.4844 |
|-----------------------------------|---------|--------|---------|--------|---------|--------|

**Supplemental Table S2** Comparing SNV calls between samples and technologies. SNVs for R9 and R10 HG002, brain, and blood samples were called using PEPPER-MARGIN-Deepvariant (PMDV) with R9 and R10 flags, respectively. SNV counts were calculated from the PMDV output VCF files for each sample using the BCFtools stats package. Counts include: total single nucleotide variants (SNVs), insertions and deletions (INDELS), transitions (TS) and transversions (TV).

|        | HG002   |         | Brain   |         | Blood   |         |
|--------|---------|---------|---------|---------|---------|---------|
|        | R9      | R10     | R9      | R10     | R9      | R10     |
| SNVs   | 4550624 | 5869049 | 5652676 | 5851663 | 4533415 | 5893333 |
| INDELS | 1353509 | 1220560 | 1314944 | 1198720 | 1358819 | 1247972 |
| TS     | 2976460 | 3521071 | 4103611 | 3501067 | 2958780 | 3538987 |
| TV     | 1577383 | 2363026 | 1552493 | 2365308 | 1578077 | 2368942 |



**Supplemental Table S3** Comparing SV calls between samples and technologies. SVs were called using Sniffles2 and SV counts were calculated from the output VCF files for R9 and R10 sequenced HG002, brain, and blood samples. Counts include: total SVs present, deletions (DELS), insertions (INS), duplications (DUP), inversions (INV), and break-ends (BND).

|           | HG002 |       | Brain |       | Blood |       |
|-----------|-------|-------|-------|-------|-------|-------|
|           | R9    | R10   | R9    | R10   | R9    | R10   |
| Total SVs | 26105 | 27428 | 26078 | 26778 | 26728 | 27643 |
| DELS      | 11350 | 11905 | 11332 | 11678 | 11577 | 11916 |
| INS       | 14627 | 15381 | 14631 | 14923 | 15047 | 15608 |
| DUP       | 31    | 27    | 23    | 45    | 19    | 25    |
| INV       | 48    | 46    | 43    | 52    | 48    | 44    |
| BND       | 49    | 69    | 49    | 80    | 37    | 50    |

**Supplemental Table S4** CpG site capture for HG002, blood, and brain samples.

Total CpG sites in BEDMethyl files, filtered to  $\geq 20$  reads and  $\leq 200$  reads.

|                       | HG002 R9   | HG002 R10  | Blood R9   | Blood R10  | Brain R9   | Brain R10  |
|-----------------------|------------|------------|------------|------------|------------|------------|
| Total Sites           | 28,798,028 | 28,760,288 | 28,623,063 | 28,606,058 | 28,814,883 | 28,798,897 |
| Filtered Sites        | 25,937,319 | 27,021,032 | 22,347,084 | 25,723,371 | 23,271,407 | 27,742,379 |
| R9 and R10<br>Overlap | 25,521,492 |            | 20,977,914 |            | 23,148,718 |            |

**Supplemental Table S5** Hyper and hypo methylated sites compared between chemistries (using R9 as a baseline) for HG002. Identifying the number of sites in HG002 data where the extremes of methylation proportions are observed across chemistries (R9). Ratios refer to the methylation proportion at a given CpG site with  $\geq 20$  reads and  $\leq 200$  reads identified as canonical or modified.

| Proportion Conditions For HG002                              | Site Count |
|--------------------------------------------------------------|------------|
| R9 Ratio = 0 and R10 Ratio = 0                               | 400,781    |
| R9 Ratio = 0 and R10 Ratio > 0                               | 105,949    |
| $0 < \text{R9 Ratio} < 1$ and $0 < \text{R10 Ratio} < 1$     | 15,517,127 |
| $0 < \text{R9 Ratio} < 1$ and R10 Ratio = 0 or R10 Ratio = 1 | 6,450,741  |
| R9 Ratio = 1 and R10 Ratio = 1                               | 1,967,470  |
| R9 Ratio = 1 and R10 Ratio < 1                               | 1,079,424  |

**Supplemental Table S6** Hyper and hypo methylated sites compared between chemistries (using R10 as a baseline) for HG002. Identifying the number of sites in HG002 data where the extremes of methylation proportions are observed across chemistries (R10). Ratios refer to the methylation proportion at a given CpG site with  $\geq 20$  reads and  $\leq 200$  reads identified as canonical or modified.

| Proportion Conditions For HG002                             | Site Count |
|-------------------------------------------------------------|------------|
| R10 Ratio = 0 and R9 Ratio = 0                              | 400,781    |
| R10 Ratio = 0 and R9 Ratio > 0                              | 1,826,337  |
| $0 < \text{R10 Ratio} < 1$ and $0 < \text{R9 Ratio} < 1$    | 15,517,127 |
| $0 < \text{R10 Ratio} < 1$ and R9 Ratio = 0 or R9 Ratio = 1 | 1,185,373  |
| R10 Ratio = 1 and R9 Ratio = 1                              | 1,967,470  |
| R10 Ratio = 1 and R9 Ratio < 1                              | 4,624,404  |

**Supplemental Table S7** Overlap of sites between R9 and R10 for HG002, blood, and brain

datasets using a more permissive cutoff of 5% instead of 0%.

| Accommodating Filter Criteria                                         | Original Filter Criteria                                             | HG002 Accommodating | HG002 Original | HG002 Delta | Blood Accommodating | Blood Original | Blood Delta | Brain Accommodating | Brain Original | Brain Delta |
|-----------------------------------------------------------------------|----------------------------------------------------------------------|---------------------|----------------|-------------|---------------------|----------------|-------------|---------------------|----------------|-------------|
| R9_ratio == 0.0, R10_ratio <= 0.05                                    | R9_ratio == 0.0, R10_ratio == 0.00                                   | 475609              | 400781         | 74828       | 402422              | 368132         | 34290       | 463876              | 399925         | 63951       |
| R9_ratio == 0.0, R10_ratio > 0.05                                     | R9_ratio == 0.0, R10_ratio > 0.00                                    | 31121               | 105949         | 74828       | 17818               | 52108          | 34290       | 22870               | 86821          | 63951       |
| R9_ratio > 0.0, R9_ratio < 1.0, R10_ratio > 0.05, R10_ratio < 0.95    | R9_ratio > 0.0, R9_ratio < 1.0, R10_ratio > 0.00, R10_ratio < 0.00   | 11502679            | 15517127       | 4014448     | 7108664             | 10432127       | 3323463     | 8047388             | 14385467       | 6338079     |
| R9_ratio > 0.0, R9_ratio < 1.0, R10_ratio <= 0.05   R10_ratio >= 0.95 | R9_ratio > 0.0, R9_ratio < 1.0, R10_ratio == 0.00   R10_ratio == 1.0 | 10465189            | 6450741        | 4014448     | 8365169             | 5041706        | 3323463     | 12131163            | 5793084        | 6338079     |
| R9_ratio == 1.0, R10_ratio >= 0.95                                    | R9_ratio == 1.0, R10_ratio >= 1.0                                    | 2807898             | 1967470        | 840428      | 4467825             | 3257111        | 1210714     | 2239047             | 1230808        | 1008239     |
| R9_ratio == 1.0, R10_ratio < 0.95                                     | R9_ratio == 1.0, R10_ratio < 1.0                                     | 238996              | 1079424        | 840428      | 616016              | 1826730        | 1210714     | 244374              | 1252613        | 1008239     |
| Total                                                                 | Total                                                                | 25521492            | 25521492       | 0           | 20977914            | 20977914       | 0           | 23148718            | 23148718       | 0           |
| R10_ratio == 0.0, R9_ratio <= 0.05                                    | R10_ratio == 0.0, R9_ratio == 0.0                                    | 1054803             | 400781         | 654022      | 683225              | 368132         | 315093      | 816065              | 399925         | 416140      |
| R10_ratio == 0.0, R9_ratio > 0.05                                     | R10_ratio == 0.0, R9_ratio > 0                                       | 1172315             | 1826337        | 654022      | 315053              | 630146         | 315093      | 541511              | 957651         | 416140      |
| R10_ratio > 0.0, R10_ratio < 1.0, R9_ratio > 0.05, R9_ratio < 0.95    | R10_ratio > 0.0, R10_ratio < 1.0, R9_ratio > 0.0, R9_ratio < 1.0     | 13364702            | 15517127       | 2152425     | 8062296             | 10432127       | 2369831     | 12135222            | 14385467       | 2250245     |

|                                                                                |                                                                              |              |              |                  |              |              |                  |              |              |                  |
|--------------------------------------------------------------------------------|------------------------------------------------------------------------------|--------------|--------------|------------------|--------------|--------------|------------------|--------------|--------------|------------------|
| R10_ratio > 0.0,<br>R10_ratio < 1.0,<br>R9_ratio <= 0.05<br>  R9_ratio >= 0.95 | R10_ratio > 0.0,<br>R10_ratio < 1.0,<br>R9_ratio <= 0.0  <br>R9_ratio >= 1.0 | 33377<br>98  | 1185<br>373  | 2152<br>425      | 42486<br>69  | 1878<br>838  | 2369<br>831      | 35896<br>79  | 1339<br>434  | 2250<br>245      |
| R10_ratio == 1.0,<br>R9_ratio >= 0.95                                          | R10_ratio ==<br>1.0, R9_ratio >=<br>1.0                                      | 43822<br>05  | 1967<br>470  | 2414<br>735      | 56453<br>17  | 3257<br>111  | 2388<br>206      | 28624<br>36  | 1230<br>808  | 1631<br>628      |
| R10_ratio == 1.0,<br>R9_ratio < 0.95                                           | R10_ratio ==<br>1.0, R9_ratio <<br>1.0                                       | 22096<br>69  | 4624<br>404  | -<br>2414<br>735 | 20233<br>54  | 4411<br>560  | -<br>2388<br>206 | 32038<br>05  | 4835<br>433  | -<br>1631<br>628 |
| Total                                                                          | Total                                                                        | 25521<br>492 | 2552<br>1492 | 0                | 20977<br>914 | 2097<br>7914 | 0                | 23148<br>718 | 2314<br>8718 | 0                |

**Supplemental Table S8** Hyper and hypo methylated sites compared between chemistries (using R9 as a baseline) for the blood sample. Identifying the number of sites in blood data where the extremes of methylation proportions are observed across chemistries (R9). Ratios refer to the methylation proportion at a given CpG site with  $\geq 20$  reads and  $\leq 200$  reads identified as canonical or modified.

| Proportion Conditions For Blood                              | Site Count |
|--------------------------------------------------------------|------------|
| R9 Ratio = 0 and R10 Ratio = 0                               | 368,132    |
| R9 Ratio = 0 and R10 Ratio > 0                               | 52,108     |
| $0 < \text{R9 Ratio} < 1$ and $0 < \text{R10 Ratio} < 1$     | 10,432,127 |
| $0 < \text{R9 Ratio} < 1$ and R10 Ratio = 0 or R10 Ratio = 1 | 5,041,706  |
| R9 Ratio = 1 and R10 Ratio = 1                               | 3,257,111  |
| R9 Ratio = 1 and R10 Ratio < 1                               | 1,826,730  |

**Supplemental Table S9** Hyper and hypo methylated sites compared between chemistries (using R10 as a baseline) for the blood sample. Identifying the number of sites in blood data where the extremes of methylation proportions are observed across chemistries (R10). Ratios refer to the methylation proportion at a given CpG site with  $\geq 20$  reads and  $\leq 200$  reads identified as canonical or modified.

| Proportion Conditions For Blood                             | Site Count |
|-------------------------------------------------------------|------------|
| R10 Ratio = 0 and R9 Ratio = 0                              | 368,132    |
| R10 Ratio = 0 and R9 Ratio > 0                              | 630,146    |
| $0 < \text{R10 Ratio} < 1$ and $0 < \text{R9 Ratio} < 1$    | 10,432,127 |
| $0 < \text{R10 Ratio} < 1$ and R9 Ratio = 0 or R9 Ratio = 1 | 1,878,838  |
| R10 Ratio = 1 and R9 Ratio = 1                              | 3,257,111  |
| R10 Ratio = 1 and R9 Ratio < 1                              | 4,411,560  |



**Supplemental Table S10** Hyper and hypo methylated sites compared between chemistries (using R9 as a baseline) for the brain sample. Identifying the number of sites in the brain sample where the extremes of methylation proportions are observed across chemistries (R9). Ratios refer to the methylation proportion at a given CpG site with  $\geq 20$  reads and  $\leq 200$  reads identified as canonical or modified.

| Proportion Conditions For Brain                              | Site Count |
|--------------------------------------------------------------|------------|
| R9 Ratio = 0 and R10 Ratio = 0                               | 399,925    |
| R9 Ratio = 0 and R10 Ratio > 0                               | 86,821     |
| $0 < \text{R9 Ratio} < 1$ and $0 < \text{R10 Ratio} < 1$     | 14,385,467 |
| $0 < \text{R9 Ratio} < 1$ and R10 Ratio = 0 or R10 Ratio = 1 | 5,793,084  |
| R9 Ratio = 1 and R10 Ratio = 1                               | 1,230,808  |
| R9 Ratio = 1 and R10 Ratio < 1                               | 1,252,613  |

**Supplemental Table S11** Hyper and hypo methylated sites compared between chemistries (using R10 as a baseline) for the brain sample. Identifying the number of sites in the brain sample data where the extremes of methylation proportions are observed across chemistries (R10). Ratios refer to the methylation proportion at a given CpG site with  $\geq 20$  reads and  $\leq 200$  reads identified as canonical or modified.

| Proportion Conditions For Brain                             | Site Count |
|-------------------------------------------------------------|------------|
| R10 Ratio = 0 and R9 Ratio = 0                              | 399,925    |
| R10 Ratio = 0 and R9 Ratio > 0                              | 957,651    |
| $0 < \text{R10 Ratio} < 1$ and $0 < \text{R9 Ratio} < 1$    | 14,385,467 |
| $0 < \text{R10 Ratio} < 1$ and R9 Ratio = 0 or R9 Ratio = 1 | 1,339,434  |
| R10 Ratio = 1 and R9 Ratio = 1                              | 1,230,808  |
| R10 Ratio = 1 and R9 Ratio < 1                              | 4,835,433  |

**Supplemental Table S12** Differentially methylated region computation statistics comparing haplotype-phased samples. Differentially methylated regions of HG002 R9 / R10 data were calculated with NanoMethPhase DMA.

|                                             | R9 Haplotype 1 vs. Haplotype 2 | R10 Haplotype 1 vs. Haplotype 2 |
|---------------------------------------------|--------------------------------|---------------------------------|
| DMR Count                                   | 10799                          | 12782                           |
| DMR CG Mean (SD)                            | 34.504 (44.487)                | 33.485 (38.603)                 |
| DMR CG Count                                | 372612                         | 428000                          |
| Methylation Proportion Difference Mean (SD) | 0.2907 (0.1557)                | 0.3143 (0.1859)                 |

**Supplemental Table S13** Differentially methylated region nucleotide overlap counts between R9 and R10 chemistries.

|                                                               | R9 DMRs   | R10 DMRs  |
|---------------------------------------------------------------|-----------|-----------|
| Number of nucleotides shared between DMRs between chemistries | 5,125,887 | 5,125,887 |
| Number of nucleotides captured by DMRs                        | 6,739,192 | 8,216,370 |

## Supplemental Methods

### Sample collection and sequencing:

The HG002 R10 sample was basecalled using Dorado v0.3.4 with the “fast” speed specified. Dorado can automatically select a basecalling model using the model speed and POD5 data.

R10 Dorado:

#### Step 1: Convert FAST5 files to POD5 files

```
pod5 convert fast5 ${FAST5_PATH} -r --output ${POD5_DIR} --one-to-one  
${FAST5_PATH}
```

#### Step 2: Basecall with Dorado

```
dorado basecaller -x cuda:all  
${DORADO_MODELS}/dna_r10.4.1_e8.2_400bps_fast@v4.1.0 ${POD5_DIR} --  
skip-model-compatibility-check --modified-bases 5mCG_5hmCG >  
${SAMPLE_NAME}.bam
```

### Comparison of Guppy and Dorado basecaller methylation proportions genome-wide:

Supplemental Figure 20A was generated with the same protocols used to create Figure 1A (see Main Methods).

### CpG site methylation frequency estimation:

The following Modkit command used to generate BEDMethyl files for samples basecalled with Guppy and Dorado with 5hmC included (results shown in Supplemental Figure S21):

```
modkit pileup --cpg --ref --only-tabs --combine-strands <IN_BAM>  
<OUT_BEDMETHYL>
```

### Haplotype-specific DMR visualization:

The Methylartist graph in Supplemental Figure S18 was generated using the same command mentioned in the Main Methods section. Supplemental Figure S19 was generated using the following command:

```
methylartist locus -b <IN_BAM1>,<IN_BAM2> -i chr16:88532537-88536321 -g <REF>  
--plot_coverage <IN_BAM1>,<IN_BAM2> --labelgenes --genes ZFPM1 --motif CG --  
phased --slidingwindowsize 5 --samplepalette colorblind --nomask --  
coverpalette viridis --ignore_ps -o <OUT_PREFIX>
```
